# Supplementary material for: Thermodynamic and kinetic properties of layered-CaCo2O4 for the Ca-ion batteries: a systematic first-principles study
Source: Royal Society of Chemistry journal article supplement (doi:10.1039/d0ta07573f), 2020-01-01
Supplement: d0ta07573f1.pdf [file d0ta07573f1.pdf]

# Thermodynamic and Kinetic Properties of Layered-CaCo<sub>2</sub>O<sub>4</sub> for the Ca-ion batteries: A Systematic First-Principles Study

Haesun Park<sup>a,b</sup>, and Peter Zapol<sup>a,b</sup>

<sup>a</sup> Materials Science Division, <sup>b</sup>Joint Center for Energy Storage Research (JCESR), Argonne National Laboratory, 9700 S Cass Ave, Lemont, IL 60439

Corresponding Author

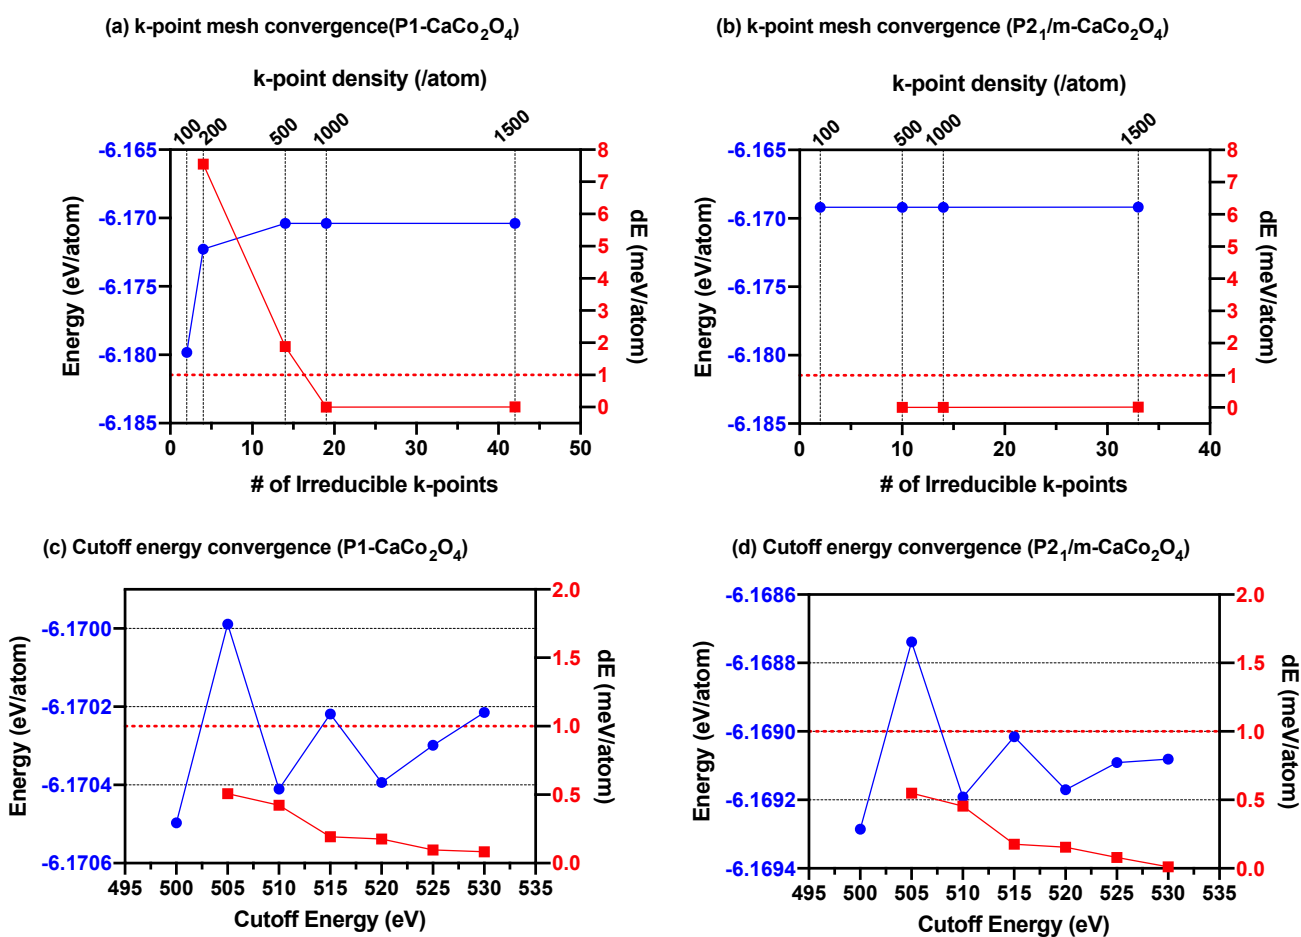

**Figure S1.** The energy convergence test as a function of the number of the irreducible k-points and cutoff energy. The energy per atom of P1- and P2<sub>1</sub>/m-CaCo<sub>2</sub>O<sub>4</sub> structures with respect to the irreducible k-points are plotted in (a) and (b), respectively, where top x-axis represents the k-point density per atom and right y-axis is the energy difference. The energies per atom of P1- and P2<sub>1</sub>/m-CaCo<sub>2</sub>O<sub>4</sub> structures as a function of cutoff energy are plotted in (c) and (d), respectively.

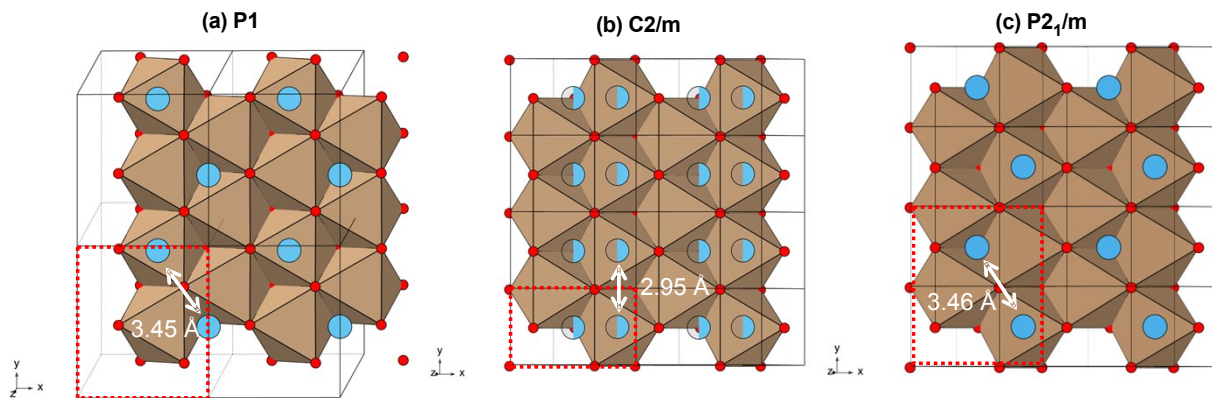

**Figure S2.** The Ca atom distribution within layer in the structures of P1 (a), C2/m (b), and P2<sub>1</sub>/m (c). The dashed red boxes represent unit cell.

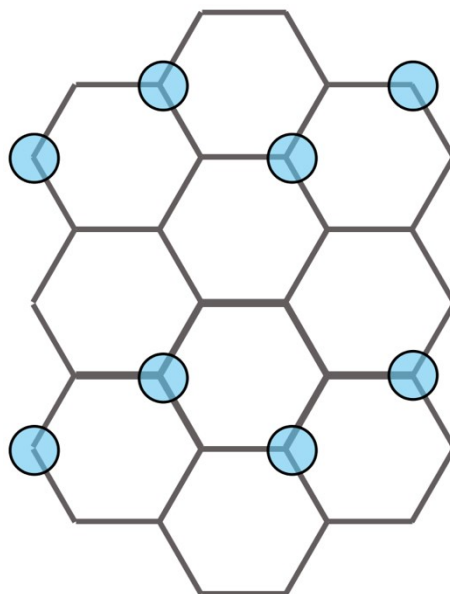

**Figure S3.** Another Ca distribution with the zigzag pattern with the angle of 60°.

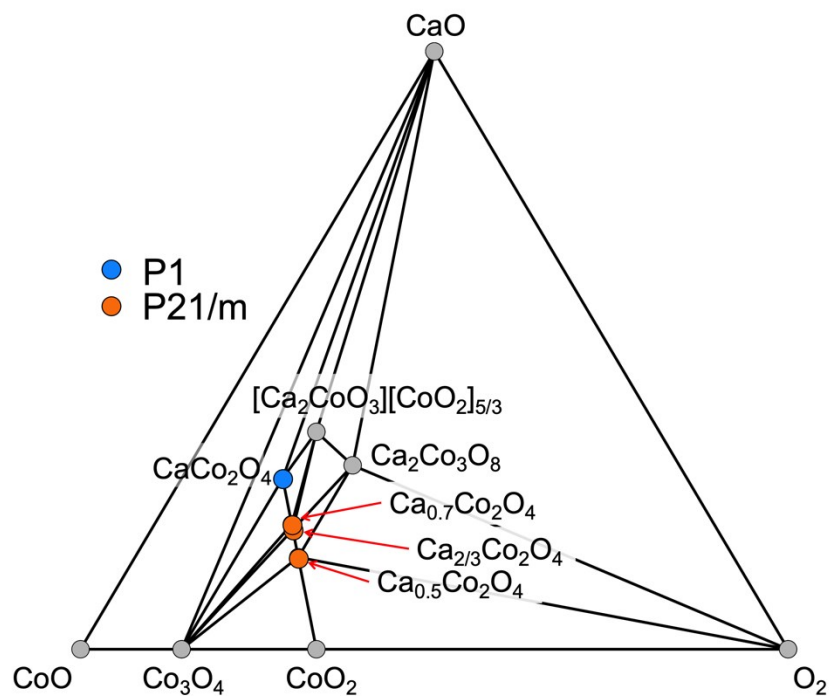

**Figure S4.** The equilibrium phase diagram of CaO-CoO-O<sub>2</sub>, where rutile CoO<sub>2</sub> is the most stable structure.

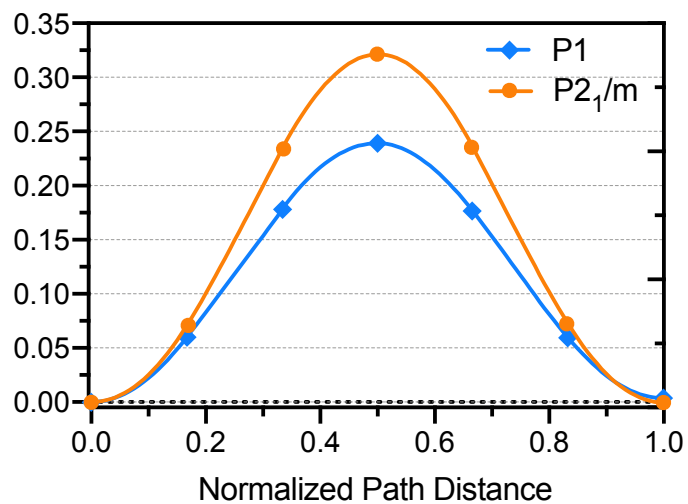

**Figure S5.** The MEP of Ca-ion migration in the high-concentration vacancy limit in P1 and P2<sub>1</sub>/m structures calculated by strongly constrained and appropriately normed semilocal density functional.

**Table S1.** Ca migration barriers in the layered  $\text{CoO}_2$  at various local environments of diffusing Ca atom. The “Limit” in dilute vacancy means a single Ca vacancy (blue box in Figure 3(b) and (e)). The “2Vac\_1” and “2Vac\_2” represents an additional vacancy at each initial and final states (orange and blue box in Figure 3(b) and (e)); and “4Vac” is for the structure with two additional vacancies at each initial and final states (magenta box in Figure 3(b) and (e)).

| Local environments of diffusing Ca |                 | Migration Barrier (eV) |       |                    |       |
|------------------------------------|-----------------|------------------------|-------|--------------------|-------|
|                                    |                 | P1                     |       | P2 <sub>1</sub> /m |       |
|                                    |                 | Intra                  | Inter | Intra              | Inter |
| Dilute Vacancy                     | Limit (blue)    | 0.72                   | 0.36  | 0.82               | 0.42  |
|                                    | 2Vac_1 (orange) | 0.89                   | 0.39  | 0.96               | 0.42  |
|                                    | 2Vac_2 (purple) | 0.90                   | 0.60  | 1.04               | 0.59  |
|                                    | 4Vac (magenta)  | 0.35                   | 0.38  | 0.36               | 0.31  |
| High Vacancy                       | Limit           | 0.27                   |       | 0.25               |       |

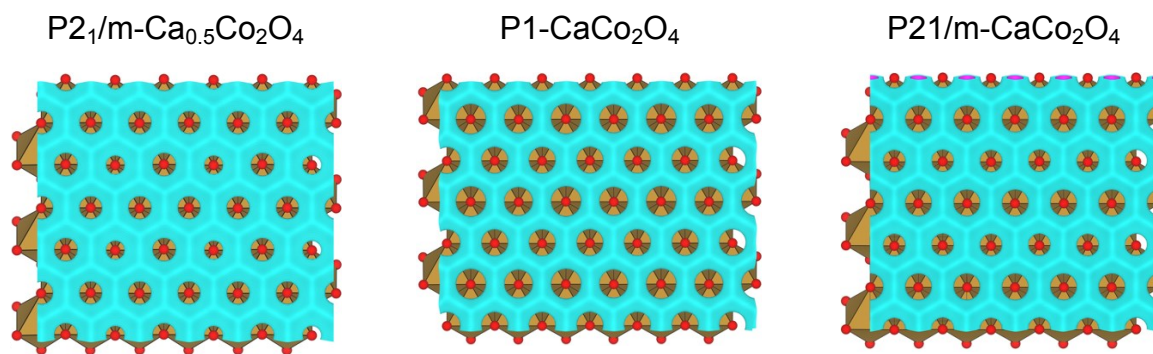

**Figure S6.** The Ca diffusion path as the isosurface of constant low bond-valence site energy of Ca within the (a) P2<sub>1</sub>/m- $\text{Ca}_{0.5}\text{Co}_2\text{O}_4$ , (b) P1- $\text{CaCo}_2\text{O}_4$ , and (c) P2<sub>1</sub>/m- $\text{CaCo}_2\text{O}_4$  structures.

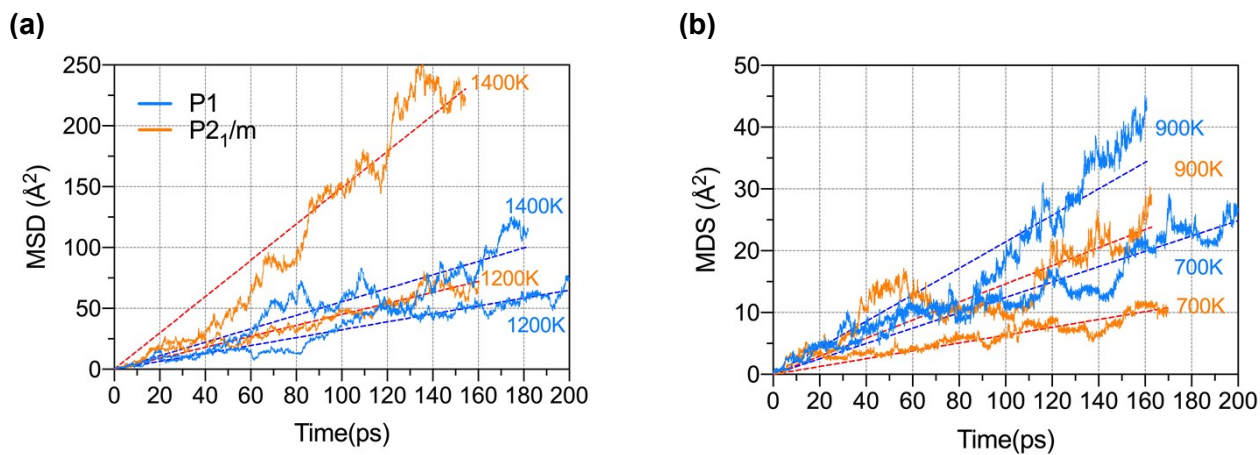

**Figure S7.** Calculated mean squared displacement (MSD) for P1- and P<sub>2<sub>1/m</sub></sub>-Ca<sub>0.5</sub>Co<sub>2</sub>O<sub>4</sub> at (a) high temperatures (1400K, 1200K) and (b) low temperatures (900K and 700K). The dashed lines signify the Einstein relation between MSD and time.

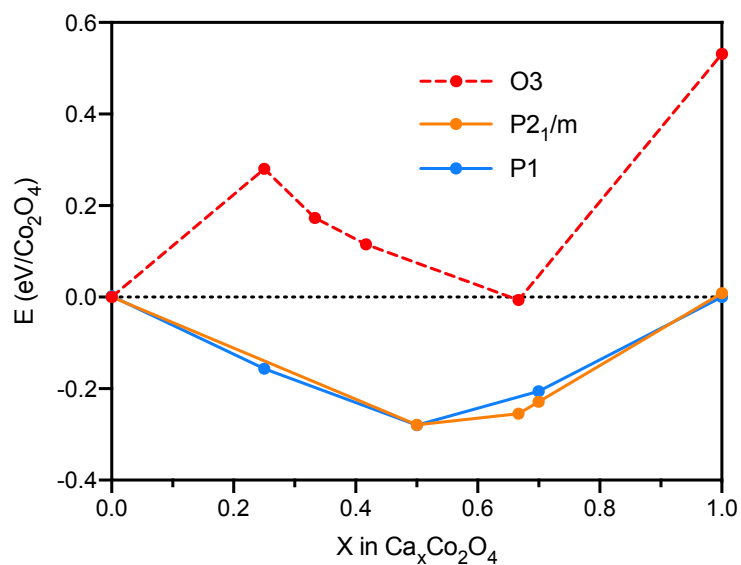

**Figure S8.** The energies of O<sub>3</sub>-Ca<sub>X</sub>Co<sub>2</sub>O<sub>4</sub>, where X is the Ca concentrations at the hull, and convex hulls of P<sub>3</sub>-types layered CaCo<sub>2</sub>O<sub>4</sub>. The energies of O<sub>3</sub>-Ca<sub>X</sub>Co<sub>2</sub>O<sub>4</sub> phase (dashed line) are referenced to the P<sub>1</sub>-CaCO<sub>2</sub>O<sub>4</sub> (X=1) and Ca metal.
